# Supplementary material
Source: Springer Nature journal article supplement (https://www.springermedizin.de/resource/supplementary/12968_2010_1428_MOESM5_ESM.pdf/9580110)

**a) Measured Arterial Input**

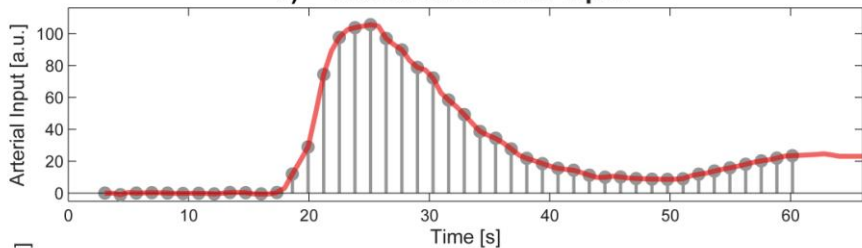

**b) Impulse Responses to Arterial Input**

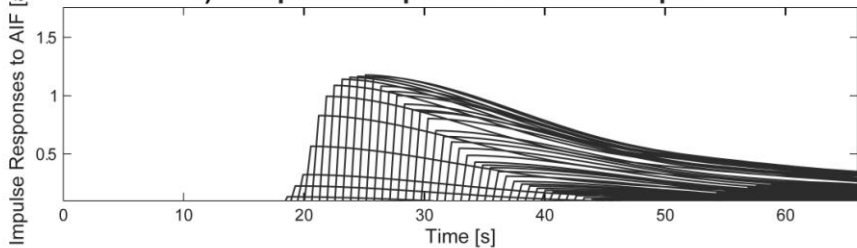

**c) Tissue Curve as Sum of Impulse Responses**

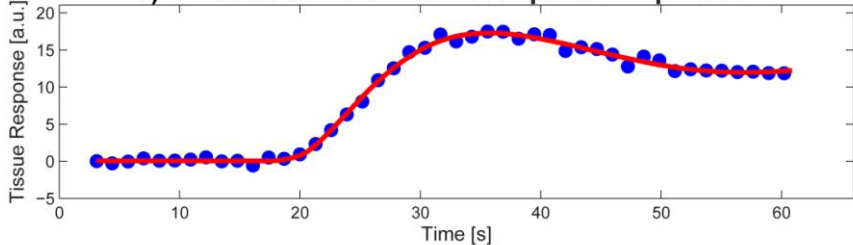

Supplement: MOESM5 [file 9580110]
